# Supplementary material for: Reliability and accuracy of ultrasound image analyses completed manually versus an automated tool
Source: PeerJ. 2022 Jun 16;10:e13609. doi: 10.7717/peerj.13609 (PMC9206842; doi:10.7717/peerj.13609)
Supplement: Supplemental Information 2 [file peerj-10-13609-s002.xlsx]

## Sheet: Sheet1
Variable	Code	Definition
Sex	0	Male
	1	Female
Race/Ethnicity	1	Hispanc/Latino
	2	White
	3	Black or African American
	4	Asian
	5	Native Hawaiin or Pacific Islander
	6	American Indian or Alaskan Native
	7	Two or More Races
